# Supplementary material
Source: PubMed Central journal article supplement (PMC5062620)
Supplement: SD2.pdf [file SD2.pdf]

SUPPLEMENTAL APPENDIX

SUPPLEMENTAL TABLE 1  
Multivariate model of predictors of *Aeromonas* positivity among MSD cases in Pakistan

|                         | 0-11 months cases (N = 788) |        |       |         | 12-23 months cases (N = 512) |        |       |         | 24-59 months cases (N = 298) |        |       |         |
|-------------------------|-----------------------------|--------|-------|---------|------------------------------|--------|-------|---------|------------------------------|--------|-------|---------|
|                         | OR                          | 95% CI |       | P value | OR                           | 95% CI |       | P value | OR                           | 95% CI |       | P value |
|                         |                             | Lower  | Upper |         |                              | Lower  | Upper |         |                              | Lower  | Upper |         |
| Model 1                 |                             |        |       |         |                              |        |       |         |                              |        |       |         |
| <i>Shigella</i> species | -                           | -      | -     | -       | 2.4                          | 1.4    | 4.0   | 0.001   | -                            | -      | -     | -       |
| NTS                     | 3.0                         | 1.2    | 7.3   | 0.015   | -                            | -      | -     | -       | -                            | -      | -     | -       |
| Model 2                 |                             |        |       |         |                              |        |       |         |                              |        |       |         |
| Breastfed               | 0.38                        | 0.2    | 0.6   | 0.001   | -                            | -      | -     | -       | -                            | -      | -     | -       |
| Dysentery               | 2.1                         | 1.2    | 3.5   | 0.006   | 2.4                          | 1.5    | 3.9   | < 0.001 | -                            | -      | -     | -       |
| Improved sanitation     | -                           | -      | -     | -       | 1.8                          | 1.1    | 3.1   | 0.024   | -                            | -      | -     | -       |
| Untreated water*        | -                           | -      | -     | -       | -                            | -      | -     | -       | 0.5                          | 0.2    | 1.0   | 0.042   |
| Model 3                 |                             |        |       |         |                              |        |       |         |                              |        |       |         |
| <i>Shigella</i> species | -                           | -      | -     | -       | 1.8                          | 1.1    | 3.3   | 0.044   | -                            | -      | -     | -       |
| Breastfed               | 0.38                        | 0.2    | 0.6   | 0.001   | -                            | -      | -     | -       | -                            | -      | -     | -       |
| Dysentery               | 2.1                         | 1.2    | 3.5   | 0.006   | 2.0                          | 1.2    | 3.4   | 0.006   | -                            | -      | -     | -       |
| Improved sanitation     | -                           | -      | -     | -       | 1.8                          | 1.1    | 3.1   | 0.03    | -                            | -      | -     | -       |
| Untreated water         | -                           | -      | -     | -       | -                            | -      | -     | -       | 0.5                          | 0.2    | 1.0   | 0.042   |

CI = confidence interval; MSD = moderate-to-severe diarrhea; NTS = nontyphoidal *Salmonella*; OR = odds ratio.  
\*Treat drinking water include any of the following method: leave water in sun to disinfect, filter through a cloth, chlorine liquid, powder or tablets, boil, filter thorough ceramic or other filter, alum.

SUPPLEMENTAL TABLE 2  
Multivariate model of predictors of *Aeromonas* positivity among MSD cases in Bangladesh

|                  | 0-11 months cases (N = 672) |        |       |         | 12-23 months cases (N = 579) |        |       |         | 24-59 months cases (N = 463) |        |       |         |
|------------------|-----------------------------|--------|-------|---------|------------------------------|--------|-------|---------|------------------------------|--------|-------|---------|
|                  | OR                          | 95% CI |       | P value | OR                           | 95% CI |       | P value | OR                           | 95% CI |       | P value |
|                  |                             | Lower  | Upper |         |                              | Lower  | Upper |         |                              | Lower  | Upper |         |
| Model 1          |                             |        |       |         |                              |        |       |         |                              |        |       |         |
| NTS              | 2.5                         | 1.2    | 5.2   | 0.018   | -                            | -      | -     | -       | -                            | -      | -     | -       |
| Model 2          |                             |        |       |         |                              |        |       |         |                              |        |       |         |
| Breastfed        | 0.4                         | 0.2    | 0.7   | 0.003   | 0.5                          | 0.3    | 1.00  | 0.049   | -                            | -      | -     | -       |
| Abdominal pain   | 1.7                         | 1.0    | 2.9   | 0.038   | -                            | -      | -     | -       | -                            | -      | -     | -       |
| Fever            | -                           | -      | -     | -       | 0.6                          | 0.4    | 1.0   | 0.054   | 0.5                          | 0.3    | 0.8   | 0.006   |
| Very thirsty     | -                           | -      | -     | -       | 0.6                          | 0.3    | 0.9   | 0.021   | -                            | -      | -     | -       |
| Sunken eyes      | -                           | -      | -     | -       | -                            | -      | -     | -       | 0.5                          | 0.2    | 0.9   | 0.033   |
| Model 3          |                             |        |       |         |                              |        |       |         |                              |        |       |         |
| NTS              | 2.2                         | 1.0    | 5.1   | 0.054   | -                            | -      | -     | -       | -                            | -      | -     | -       |
| Breastfed        | 0.4                         | 0.2    | 0.7   | 0.004   | -                            | -      | -     | -       | -                            | -      | -     | -       |
| Abdominal pain   | 1.6                         | 1.0    | 2.7   | 0.072   | -                            | -      | -     | -       | -                            | -      | -     | -       |
| Offered to drink | 0.2                         | 0.1    | 0.9   | 0.034   | -                            | -      | -     | -       | -                            | -      | -     | -       |

CI = confidence interval; MSD = moderate-to-severe diarrhea; NTS = nontyphoidal *Salmonella*; OR = odds ratio.
